# Supplementary material for: Paradoxical role of structural degradation of nickel-rich layered oxides in capacity retention upon storage of lithium-ion batteries
Source: Royal Society of Chemistry journal article supplement (doi:10.1039/d3ee02334f), 2023-01-01
Supplement: d3ee02334f1.pdf [file d3ee02334f1.pdf]

## Electronic Supplementary Information (ESI)

### **Paradoxical role of structural degradation of nickel-rich layered oxides in capacity retention upon storage of lithium-ion batteries**

Hyejeong Hyun<sup>1§</sup>, Hyojung Yoon<sup>2§</sup>, Subin Choi<sup>1</sup>, Juri Kim<sup>2</sup>, So Young Kim<sup>2</sup>, Tom Regier<sup>3</sup>, Zachary Arthur<sup>3</sup>, SeokKoo Kim<sup>2</sup>, Jongwoo Lim<sup>1\*</sup>

<sup>1</sup> Department of Chemistry, Seoul National University, Seoul, 08826, Republic of Korea

<sup>2</sup> Battery Research Center, LG Energy Solution, Daejeon, 34122, Republic of Korea

<sup>3</sup> Canadian Light Source, University of Saskatchewan 44 Innovation Boulevard, Saskatoon, SK S7N 2V3, Canada

\*Corresponding author: [jwlim@snu.ac.kr](mailto:jwlim@snu.ac.kr)

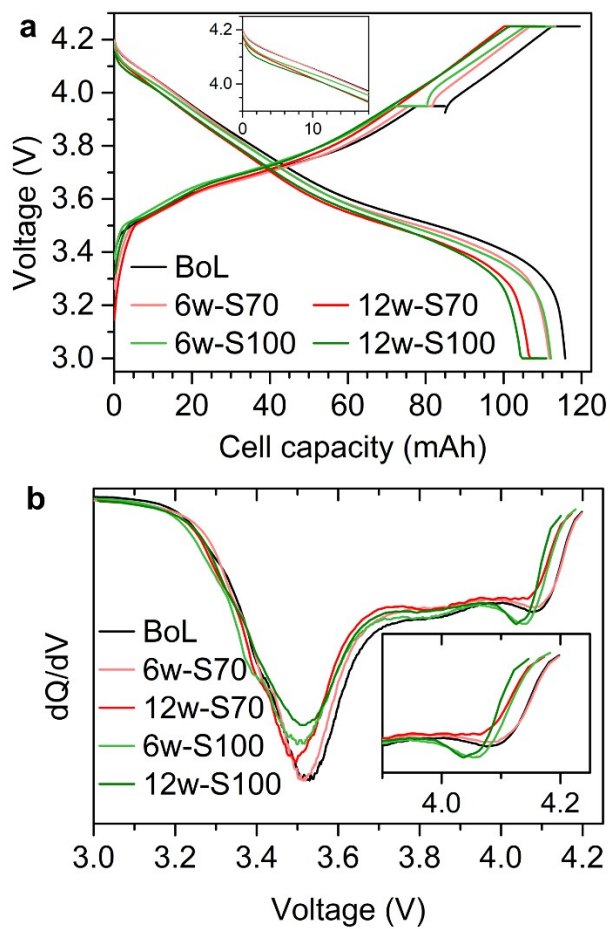

**Fig. S1** **a** Voltage profiles of NCM6/graphite pouch cells during *operando* XRD experiments (Fig. 2 and Fig. 3). **b** dQ/dV profile during discharge. The pouch cells were CCCV charged (CCCV cutoff 0.05C) at C/3 and CC discharged at C/3 (1C = 120 mA), in the voltage range of 3.0–4.25 V.

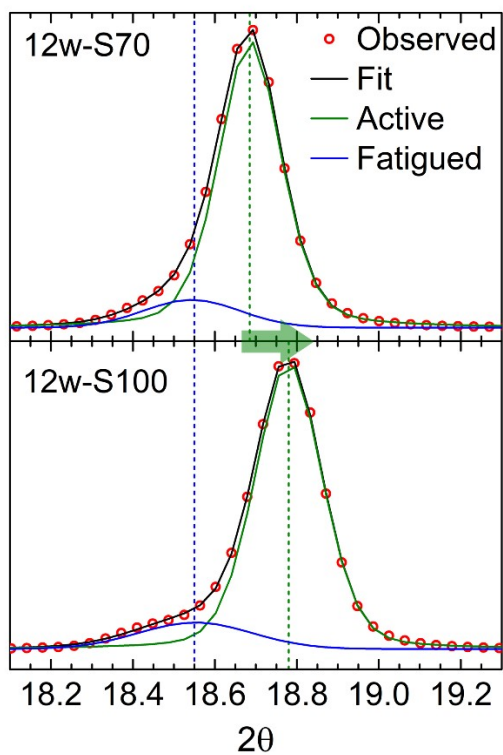

**Fig. S2** Representative examples of deconvolution of *operando* XRD pattern of (003) Bragg peak of NCM6 cathodes at the charge endpoint of NCM6/graphite cells.

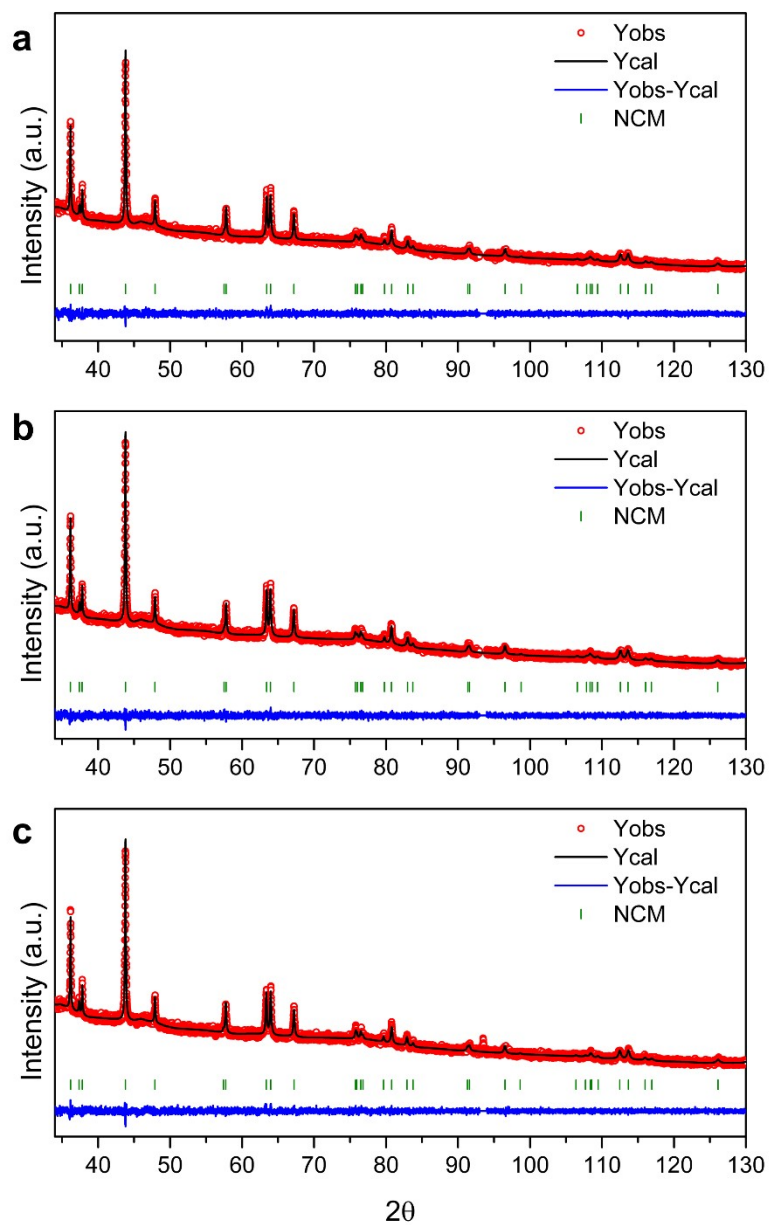

**Fig. S3** Ex situ SXR D patterns of **a** BoL, **b** 12w-S70, and **c** 12w-S100 NCM6 cathodes at the discharge endpoint. The signals at a low  $2\theta$  region ( $< 35^\circ$ ) were excluded due to the strong background signal.

**Table S1** Rietveld refinement results of ex situ SXRD patterns (Fig. S3) of NCM6 cathodes at the discharge endpoint. As the z-coordinate of O ( $z_O$ ) in 6c sites only can be varied, other atomic coordinates of 3a and 3b sites are omitted hereafter.

|                     | <b>BoL</b> | <b>12w-S70</b> | <b>12w-S100</b> |
|---------------------|------------|----------------|-----------------|
| a (Å)               | 2.87174(6) | 2.87201(5)     | 2.87064(5)      |
| c (Å)               | 14.2296(3) | 14.2300(3)     | 14.2484(3)      |
| V (Å <sup>3</sup> ) | 101.628(4) | 101.650(3)     | 101.684(3)      |
| $z_O$               | 0.2591(3)  | 0.2589(3)      | 0.2596(3)       |
| TM <sub>Li</sub>    | 0.027(2)   | 0.031(1)       | 0.023(2)        |
| R <sub>Bragg</sub>  | 2.42       | 2.49           | 3.06            |
| $\chi^2$            | 1.12       | 1.14           | 1.13            |

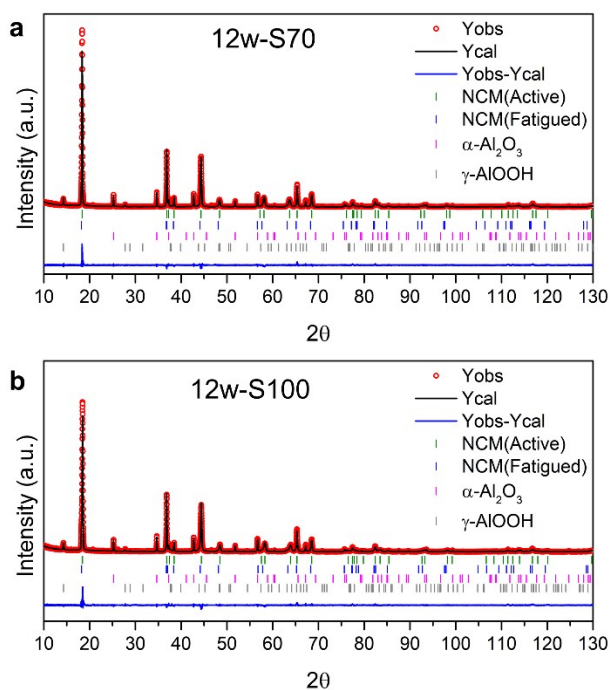

**Fig. S4** Rietveld refinement of ex situ SXR D patterns of 12-week-stored NCM6 cathodes at the charge endpoint (CCCV charged to 4.3 V versus Li, with the voltage hold until current decays to 0.01C). **a** 12w-S70 and **b** 12w-S100. Two additional phases,  $\alpha$ -Al<sub>2</sub>O<sub>3</sub> and  $\gamma$ -AlOOH, were included for profile fitting, since the alumina-coated separator was used in the cells and coated ceramic was partially transferred onto the cathode surface.

**Table S2** Rietveld refinement results of the 12w-S70, 12w-S100 NCM6 cathodes at the charge endpoint (Fig. S4). The phase fractions of active and fatigued phases were recalculated excluding those of  $\alpha$ -Al<sub>2</sub>O<sub>3</sub> and  $\gamma$ -AlOOH.

|                     | BoL        | 12w-S70    |             | 12w-S100   |             |
|---------------------|------------|------------|-------------|------------|-------------|
|                     |            | Active     | Fatigued    | Active     | Fatigued    |
| a (Å)               | 2.81725(1) | 2.81714(1) | 2.8253(2)   | 2.81849(2) | 2.82357(8)  |
| c (Å)               | 14.3114(2) | 14.2917(1) | 14.4298(11) | 14.2228(2) | 14.3911(14) |
| V (Å <sup>3</sup> ) | 98.370(2)  | 98.227(1)  | 99.753(11)  | 97.847(2)  | 99.362(10)  |
| z <sub>O</sub>      | 0.26745(8) | 0.26671(8) | 0.2779(13)  | 0.26677(9) | 0.27213(48) |
| R <sub>Bragg</sub>  | 8.53       | 5.54       | 3.89        | 5.97       | 3.10        |
| Fraction(%)         | 100        | 94.8(5)    | 5.2(3)      | 84.7(6)    | 15.3(4)     |
| $\chi^2$            | 3.24       | 2.53       |             | 2.47       |             |

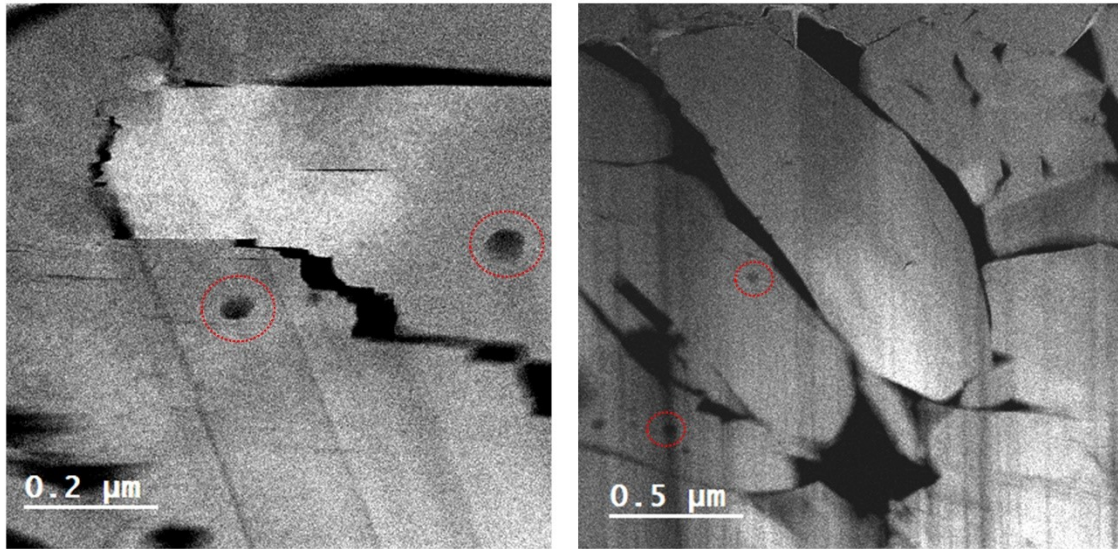

**Fig. S5** TEM images of the 12w-S100 NCM6 cathode.

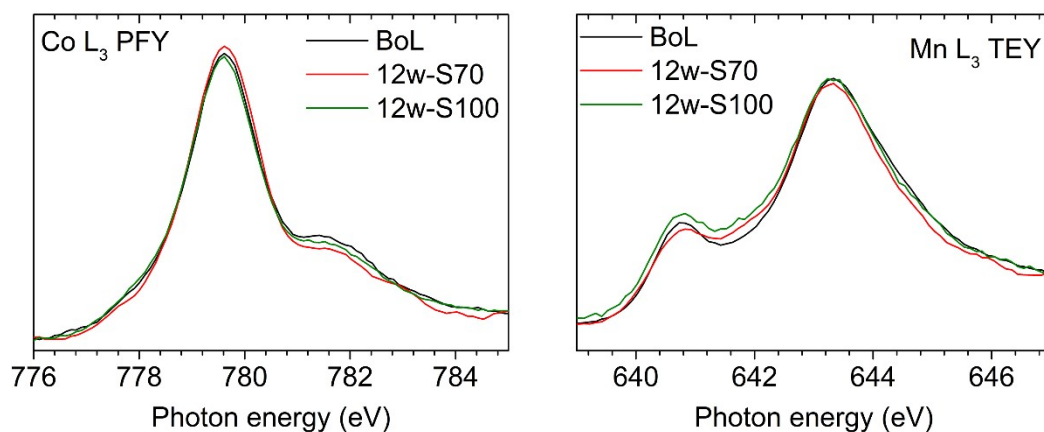

**Fig. S6** Co L<sub>3</sub>-edge PFY and Mn L<sub>3</sub>-edge TEY spectra of the 12-week-stored NCM6 cathodes at the charge endpoint.

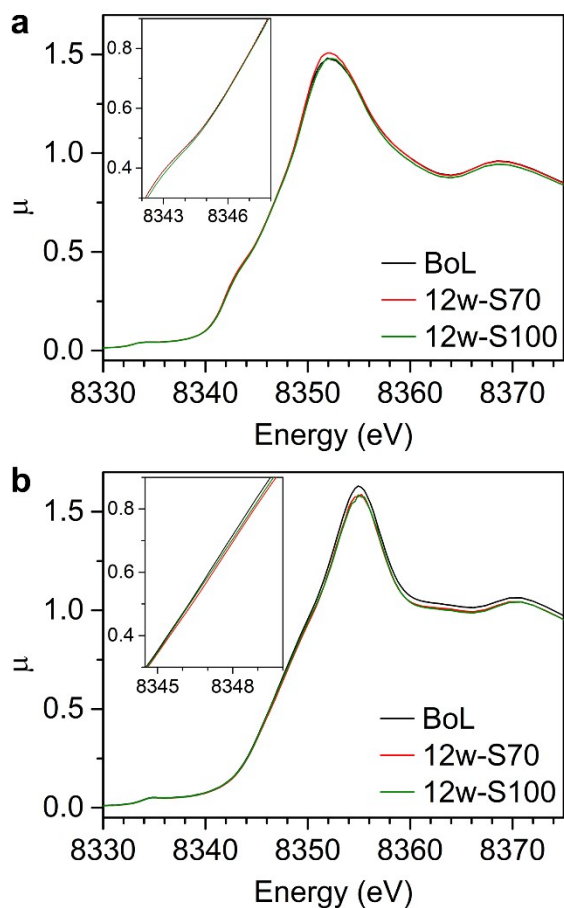

**Fig. S7** Ex situ Ni K-edge XANES spectra of 12-week-stored NCM6 cathodes at the **a** discharge endpoint and **b** charge endpoint.



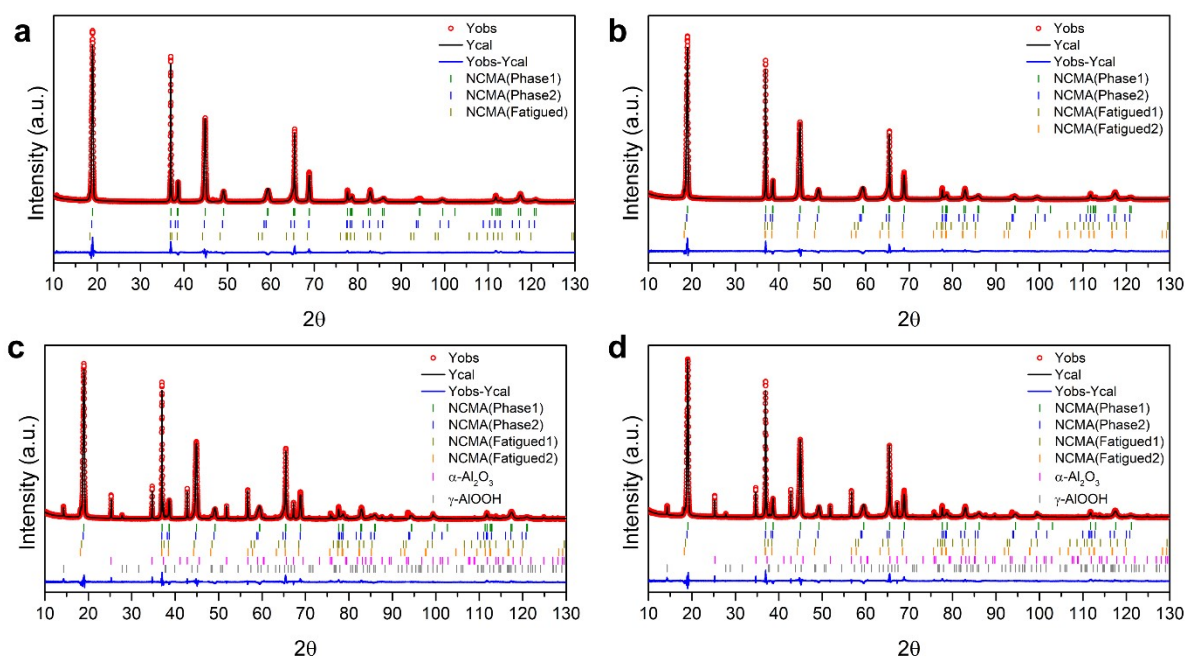

**Fig. S8** Ex situ SXR D patterns and Rietveld refinement of **a** BoL, **b** 4w-S30, **c** 4w-S70, and **d** 4w-S100 NCMA8 cathodes at the charge endpoint. Two additional phases,  $\alpha$ - $\text{Al}_2\text{O}_3$  and  $\gamma$ - $\text{AlOOH}$ , were included for profile fitting, since the alumina-coated separator was used in the cells and coated ceramic was partially transferred onto the cathode surface.

**Table S3** Rietveld refinement results of BoL NCMA8 cathode at the charge endpoint (Fig. S8a).

|                      | Phase1     | Phase2     | Fatigued  |
|----------------------|------------|------------|-----------|
| a ( $\text{\AA}$ )   | 2.81392(2) | 2.81602(4) | 2.8226(6) |
| c ( $\text{\AA}$ )   | 13.8584(6) | 14.031(2)  | 14.325(2) |
| V ( $\text{\AA}^3$ ) | 95.032(4)  | 96.36(2)   | 98.84(3)  |
| $z_{\text{O}}$       | 0.2642(1)  | 0.2660(3)  | -         |
| $R_{\text{Bragg}}$   | 5.37       | 4.70       | 10.5      |
| Fraction(%)          | 78.7(1.6)  | 17.6(1.1)  | 3.6(2)    |
| $\chi^2$             | 4.07       |            |           |

**Table S4** Rietveld refinement results of 4w-S30 NCMA8 cathode at the charge endpoint (Fig. S8b).

|                     | Phase1     | Phase2     | Fatigued1 | Fatigued2 |
|---------------------|------------|------------|-----------|-----------|
| a (Å)               | 2.81374(2) | 2.81575(3) | 2.8222(5) | 2.8194(5) |
| c (Å)               | 13.8373(7) | 13.990(2)  | 14.273(1) | 14.425(1) |
| V (Å <sup>3</sup> ) | 94.874(5)  | 96.06(2)   | 98.32(3)  | 99.30(3)  |
| z <sub>O</sub>      | 0.2632(1)  | 0.2661(2)  | -         | -         |
| R <sub>Bragg</sub>  | 5.41       | 5.94       | 10.3      | 12.8      |
| Fraction(%)         | 62.2(2.1)  | 32.2(1.7)  | 3.0(2)    | 2.7(2)    |
| $\chi^2$            | 4.01       |            |           |           |

**Table S5** Rietveld refinement results of 4w-S70 NCMA8 cathode at the charge endpoint (Fig. S8c).

|                     | Phase1     | Phase2     | Fatigued1 | Fatigued2 |
|---------------------|------------|------------|-----------|-----------|
| a (Å)               | 2.81395(2) | 2.81602(3) | 2.8218(6) | 2.8205(5) |
| c (Å)               | 13.8227(8) | 13.965(2)  | 14.243(2) | 14.421(1) |
| V (Å <sup>3</sup> ) | 94.789(6)  | 95.91(2)   | 98.21(3)  | 99.35(3)  |
| z <sub>O</sub>      | 0.2627(2)  | 0.2652(2)  | -         | -         |
| R <sub>Bragg</sub>  | 4.54       | 5.41       | 12.6      | 15.5      |
| Fraction(%)         | 59.6(2.3)  | 33.5(2.1)  | 3.0(3)    | 3.9(2)    |
| $\chi^2$            | 4.47       |            |           |           |

**Table S6** Rietveld refinement results of 4w-S100 NCMA8 cathode at the charge endpoint (Fig. S8d).

|                     | Phase1     | Phase2     | Fatigued1 | Fatigued2 |
|---------------------|------------|------------|-----------|-----------|
| a (Å)               | 2.81441(2) | 2.81683(3) | 2.8275(9) | 2.8188(7) |
| c (Å)               | 13.7865(8) | 13.935(2)  | 14.198(3) | 14.420(2) |
| V (Å <sup>3</sup> ) | 94.571(5)  | 95.75(2)   | 98.30(5)  | 99.22(4)  |
| z <sub>O</sub>      | 0.2626(1)  | 0.2640(4)  | -         | -         |
| R <sub>Bragg</sub>  | 4.47       | 6.33       | 16.4      | 19.8      |
| Fraction(%)         | 73.2(1.8)  | 20.3(1.4)  | 3.9(3)    | 2.6(2)    |
| $\chi^2$            | 4.99       |            |           |           |

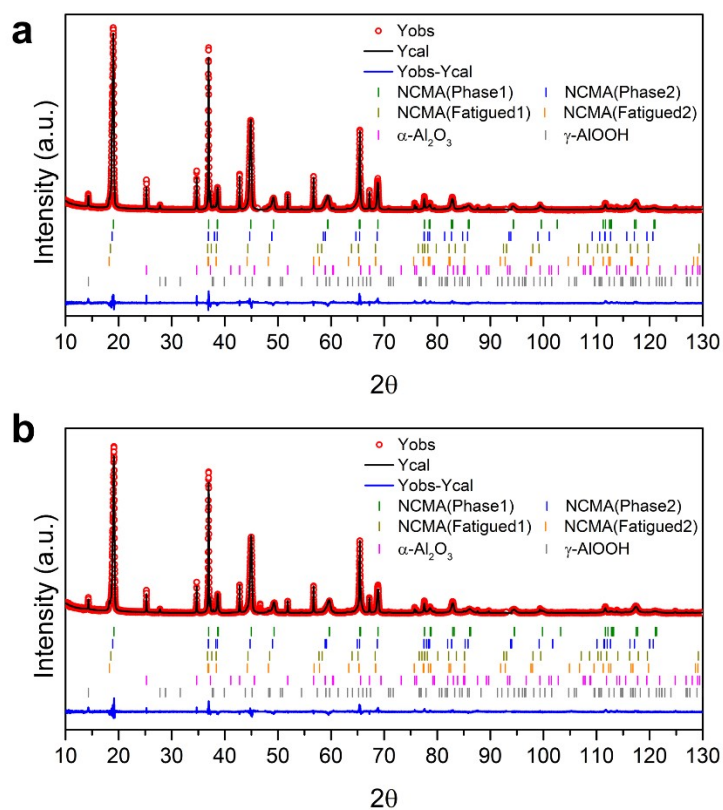

**Fig. S9** Ex situ SXR D patterns and Rietveld refinement of 12-week-stored NCMA8 cathodes at the charge endpoint of **a** 12w-S70 and **b** 12w-S100. Two additional phases,  $\alpha$ -Al<sub>2</sub>O<sub>3</sub> and  $\gamma$ -AlOOH, were included for profile fitting, since the alumina-coated separator was used in the cells and coated ceramic was partially transferred onto the cathode surface.

**Table S7** Rietveld refinement results of 12w-S70 NCMA8 cathode at the charge endpoint (Fig. S9a).

|                     | Phase1     | Phase2     | Fatigued1 | Fatigued2 |
|---------------------|------------|------------|-----------|-----------|
| a (Å)               | 2.81478(2) | 2.81704(4) | 2.8257(7) | 2.8216(9) |
| c (Å)               | 13.8260(6) | 14.002(2)  | 14.229(2) | 14.417(2) |
| V (Å <sup>3</sup> ) | 94.867(4)  | 96.23(1)   | 98.39(4)  | 99.40(5)  |
| z <sub>O</sub>      | 0.2627(2)  | 0.2647(3)  | -         | -         |
| R <sub>Bragg</sub>  | 4.81       | 6.39       | 15.8      | 21.6      |
| Fraction(%)         | 67.0(1.2)  | 25.4(1.1)  | 4.7(5)    | 2.9(3)    |
| $\chi^2$            | 4.50       |            |           |           |

**Table S8** Rietveld refinement results of 12w-S100 NCMA8 cathode at the charge endpoint (Fig. S9b).

|                     | Phase1     | Phase2     | Fatigued1 | Fatigued2 |
|---------------------|------------|------------|-----------|-----------|
| a (Å)               | 2.81545(2) | 2.81803(4) | 2.8292(7) | 2.8219(7) |
| c (Å)               | 13.7541(6) | 13.924(2)  | 14.186(2) | 14.394(2) |
| V (Å <sup>3</sup> ) | 94.418(4)  | 95.76(1)   | 98.34(4)  | 99.26(4)  |
| z <sub>O</sub>      | 0.2637(2)  | 0.2640(3)  | -         | -         |
| R <sub>Bragg</sub>  | 5.05       | 6.06       | 8.93      | 12.7      |
| Fraction(%)         | 65.6(1.4)  | 25.4(1.2)  | 5.7(5)    | 3.3(3)    |
| $\chi^2$            | 2.63       |            |           |           |

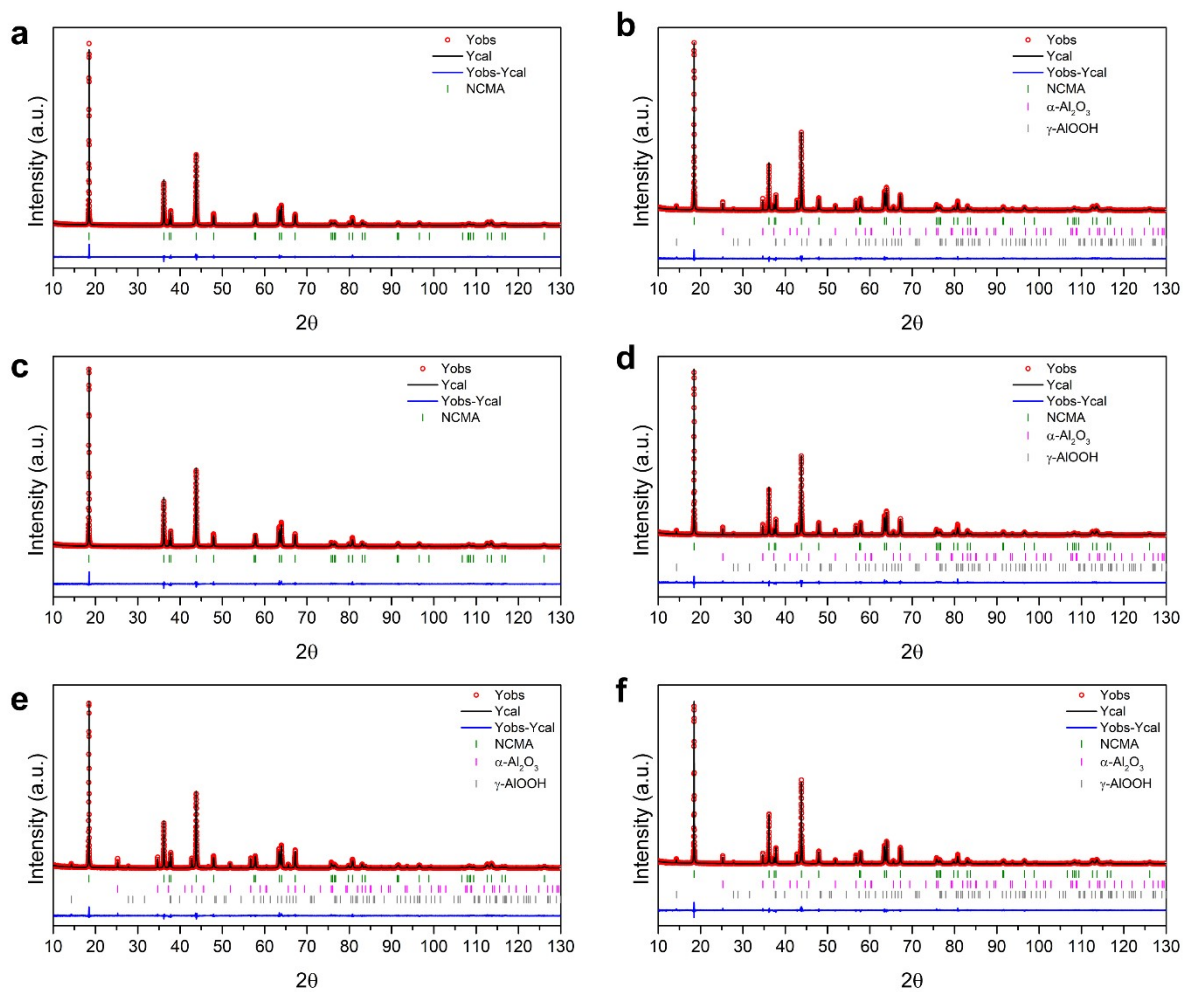

**Fig. S10** Ex situ SXR D patterns of **a** BoL, **b** 4w-S30, **c** 4w-S70, **d** 4w-S100, **e** 12w-S70, and **f** 12w-S100 NCMA8 cathodes at the discharge endpoint. Two additional phases,  $\alpha$ -Al<sub>2</sub>O<sub>3</sub> and  $\gamma$ -AlOOH, were included for profile fitting, since the alumina-coated separator was used in the cells and coated ceramic was partially transferred onto the cathode surface.

**Table S9** Rietveld refinement results of 4- and 12-week-stored NCMA8 cathodes at the discharge endpoint (Fig. S10).

|                            | <b>BoL</b>  | <b>4w-S30</b> | <b>4w-S70</b> | <b>4w-S100</b> | <b>12w-S70</b> | <b>12w-S100</b> |
|----------------------------|-------------|---------------|---------------|----------------|----------------|-----------------|
| <b>a</b> (Å)               | 2.87406(1)  | 2.87347(1)    | 2.87328(1)    | 2.87334(1)     | 2.87216(1)     | 2.87258(1)      |
| <b>c</b> (Å)               | 14.21942(9) | 14.22109(1)   | 14.22314(1)   | 14.22491(1)    | 14.22846(1)    | 14.23026(1)     |
| <b>V</b> (Å <sup>3</sup> ) | 101.720(1)  | 101.690(1)    | 101.691(1)    | 101.708(1)     | 101.650(1)     | 101.692(1)      |
| <b>z<sub>O</sub></b>       | 0.25915(7)  | 0.25869(8)    | 0.25916(8)    | 0.25890(9)     | 0.25924(8)     | 0.25859(8)      |
| <b>TM<sub>Li</sub></b>     | 0.019(1)    | 0.025(1)      | 0.025(1)      | 0.030(1)       | 0.025(1)       | 0.027(1)        |
| <b>R<sub>Bragg</sub></b>   | 3.53        | 2.49          | 3.55          | 3.65           | 3.35           | 3.01            |
| <b>χ<sup>2</sup></b>       | 1.90        | 1.61          | 1.70          | 1.86           | 1.73           | 1.70            |

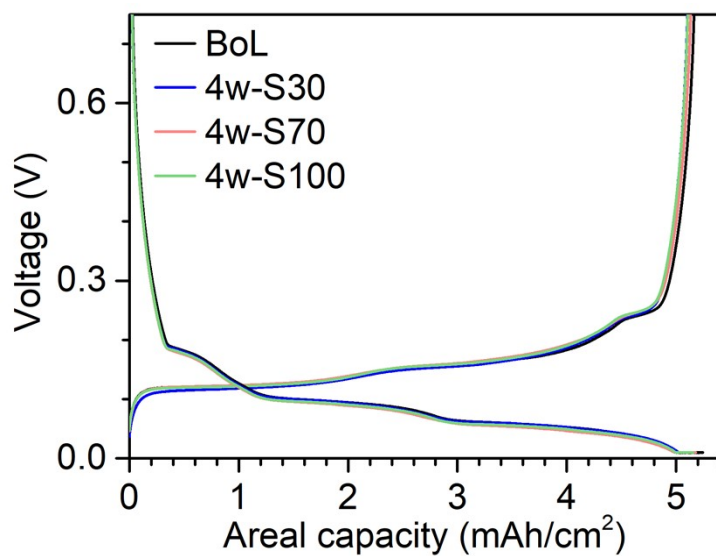

**Fig. S11** Voltage profiles of graphite anodes retrieved from aged NCMA8/graphite cells at 0.5 mA cm<sup>-2</sup> in the voltage range of 0.01–1.5V versus Li.

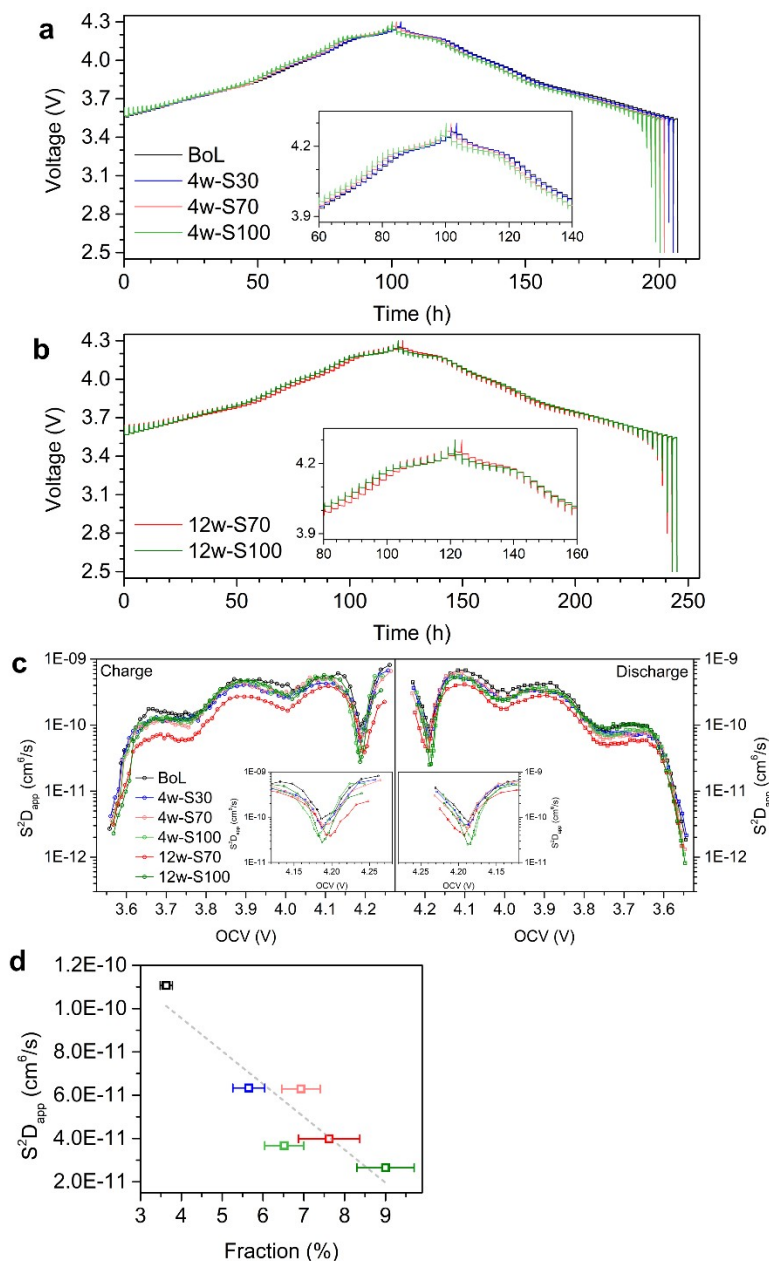

**Fig. S12** GITT results of aged NCMA8 cathodes. **a,b** Voltage profiles during GITT measurements. **c** Calculated diffusion coefficients versus OCV measured during charging (left) and discharging (right). Since the accurate quantification of active surface area is not straightforward in thick porous electrodes, area-independent form of diffusivities ( $S^2D$ ) are compared. Inset: expansion of diffusion coefficients at OCV  $\sim 4.2$  V **d** Linear correlation between the local minima of the apparent diffusion coefficients at  $\sim 4.2$  V and the fraction of fatigued phases obtained from ex situ SXR at the charge endpoint.



Galvanostatic intermittent titration technique (GITT) was performed in a cathode half-cell after two CCCV charge-discharge cycles in the voltage range of 2.5–4.3 V at 0.1C, with the current calculated based on the capacity of BoL ( $\sim 5 \text{ mAh cm}^{-2}$ ). For the GITT, a 0.1C current pulse was applied for 10 min followed by 90 min rest period in the voltage range of 2.5–4.3 V versus Li. For 12-week-stored cathode, 120 min of rest period was applied. Lithium diffusion coefficient was calculated at each pulse based on the following formula.<sup>1,2</sup>

$$D = \frac{4}{\pi} \left( \frac{iV_m}{FS} \right)^2 \left[ \frac{\left( \frac{dE_s}{d\delta} \right)}{\left( \frac{dE}{d\sqrt{t}} \right)} \right]^2 \quad S^2 D = \frac{4}{\pi} \left( \frac{iV_m}{F} \right)^2 \left[ \frac{\left( \frac{dE_s}{d\delta} \right)}{\left( \frac{dE}{d\sqrt{t}} \right)} \right]^2$$

Here,  $i$  is the pulse current (A),  $V_m$  is molar volume of active material ( $\text{cm}^3 \text{ mol}^{-1}$ ),  $F$  is Faraday constant ( $96485 \text{ C mol}^{-1}$ ), and  $S$  is the active surface area for Li insertion ( $\text{cm}^2$ ).

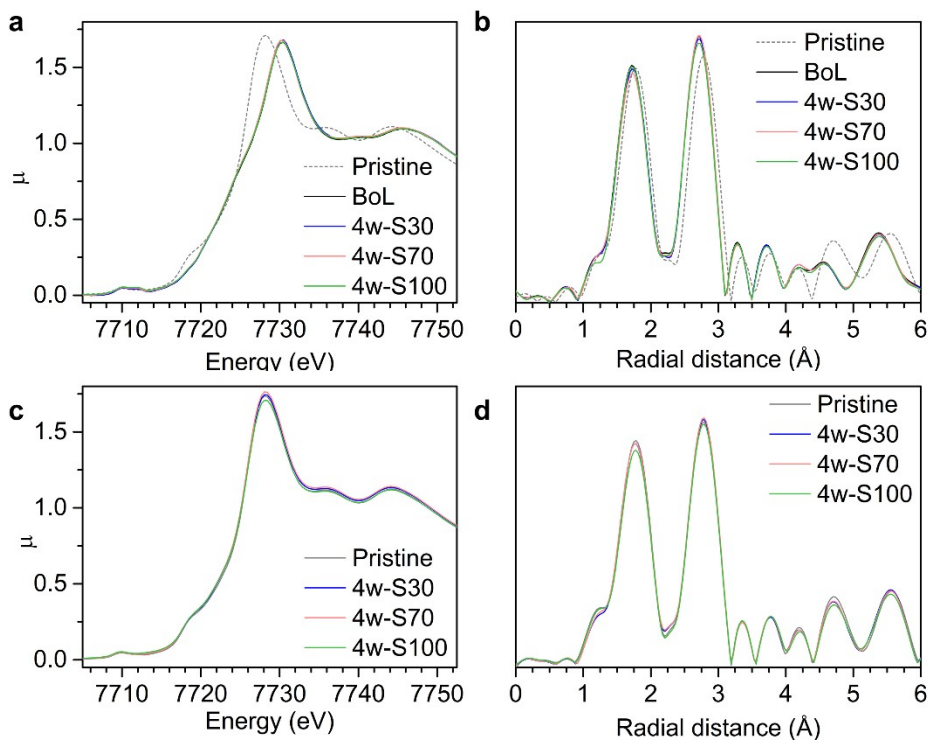

**Fig. S13** Co K-edge XAFS results of 4-week-stored NCMA8 cathodes. **a** XANES spectra and **b**  $k^2$ -weighted FT-EXAFS magnitudes at the charge endpoint. **c** XANES spectra and **d**  $k^2$ -weighted FT-EXAFS magnitudes at the discharge endpoint. The Fourier transforms are corrected for the phase shifts of photoelectrons, to compare the radial distances with the actual distances estimated from XRD.

**Table S10** Curve fitting results for Co K-edge EXAFS of 4-week-stored NCMA8 cathodes at the charge endpoint (Fig. S13b).

|         | Path  | $\sigma^2(\text{\AA}^2)$ | R( $\text{\AA}$ ) | $\chi_r^2$ | R-factor |
|---------|-------|--------------------------|-------------------|------------|----------|
| BoL     | Co-O  | 0.0027(5)                | 1.856(6)          | 91.2       | 0.0065   |
|         | Co-TM | 0.0039(3)                | 2.793(6)          |            |          |
| 4w-S30  | Co-O  | 0.0030(6)                | 1.857(8)          | 62.2       | 0.0071   |
|         | Co-TM | 0.0041(3)                | 2.791(8)          |            |          |
| 4w-S70  | Co-O  | 0.0031(5)                | 1.860(6)          | 45.3       | 0.0066   |
|         | Co-TM | 0.0039(3)                | 2.795(7)          |            |          |
| 4w-S100 | Co-O  | 0.0027(5)                | 1.855(7)          | 68.1       | 0.0057   |
|         | Co-TM | 0.0043(3)                | 2.789(8)          |            |          |

**Table S11** Curve fitting results for Co K-edge EXAFS of 4-week-stored NCMA8 cathodes at the discharge endpoint (Fig. S13d).

|          | Path  | $\sigma^2(\text{\AA}^2)$ | R( $\text{\AA}$ ) | $\chi_r^2$ | R-factor |
|----------|-------|--------------------------|-------------------|------------|----------|
| Pristine | Co-O  | 0.0029(4)                | 1.902(4)          | 41.9       | 0.0035   |
|          | Co-TM | 0.0046(2)                | 2.852(5)          |            |          |
| 4w-S30   | Co-O  | 0.0031(4)                | 1.899(4)          | 77.8       | 0.0031   |
|          | Co-TM | 0.0045(2)                | 2.851(4)          |            |          |
| 4w-S70   | Co-O  | 0.0032(4)                | 1.899(5)          | 87.5       | 0.0037   |
|          | Co-TM | 0.0044(2)                | 2.851(5)          |            |          |
| 4w-S100  | Co-O  | 0.0034(4)                | 1.901(5)          | 73.2       | 0.0038   |
|          | Co-TM | 0.0046(3)                | 2.852(5)          |            |          |

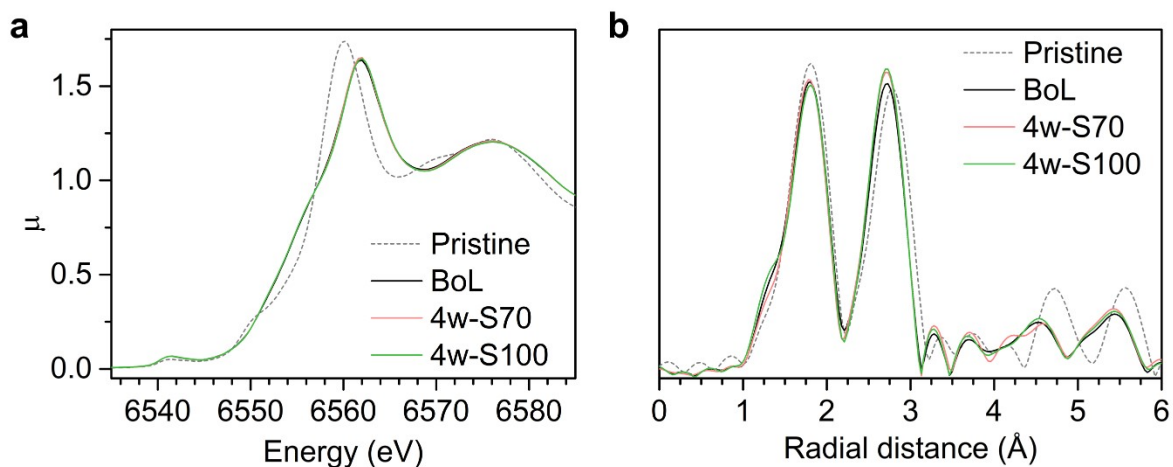

**Fig. S14** Mn K-edge XAFS results of 4-week-stored NCMA8 cathodes. **a** XANES spectra and **b**  $k^2$ -weighted FT-EXAFS magnitudes at the charge endpoint. The Fourier transforms are corrected for the phase shifts of photoelectrons, to compare the radial distances with the actual distances estimated from XRD.

**Table S12** Curve fitting results for Mn K-edge EXAFS of 4-week-stored NCMA8 cathodes at the charge endpoint (Fig. S14b).

|          | Path  | $\sigma^2$ ( $\text{\AA}^2$ ) | R ( $\text{\AA}$ ) | $\chi_r^2$ | R-factor |
|----------|-------|-------------------------------|--------------------|------------|----------|
| Pristine | Mn-O  | 0.0041(7)                     | 1.875(8)           | 145.9      | 0.0116   |
|          | Mn-TM | 0.0063(5)                     | 2.861(8)           |            |          |
| BoL      | Mn-O  | 0.0046(7)                     | 1.845(13)          | 56.6       | 0.0115   |
|          | Mn-TM | 0.0068(5)                     | 2.797(15)          |            |          |
| 4w-S70   | Mn-O  | 0.0046(6)                     | 1.845(10)          | 34.5       | 0.0093   |
|          | Mn-TM | 0.0065(4)                     | 2.797(12)          |            |          |
| 4w-S100  | Mn-O  | 0.0050(7)                     | 1.846(12)          | 43.9       | 0.0111   |
|          | Mn-TM | 0.0066(5)                     | 2.797(14)          |            |          |

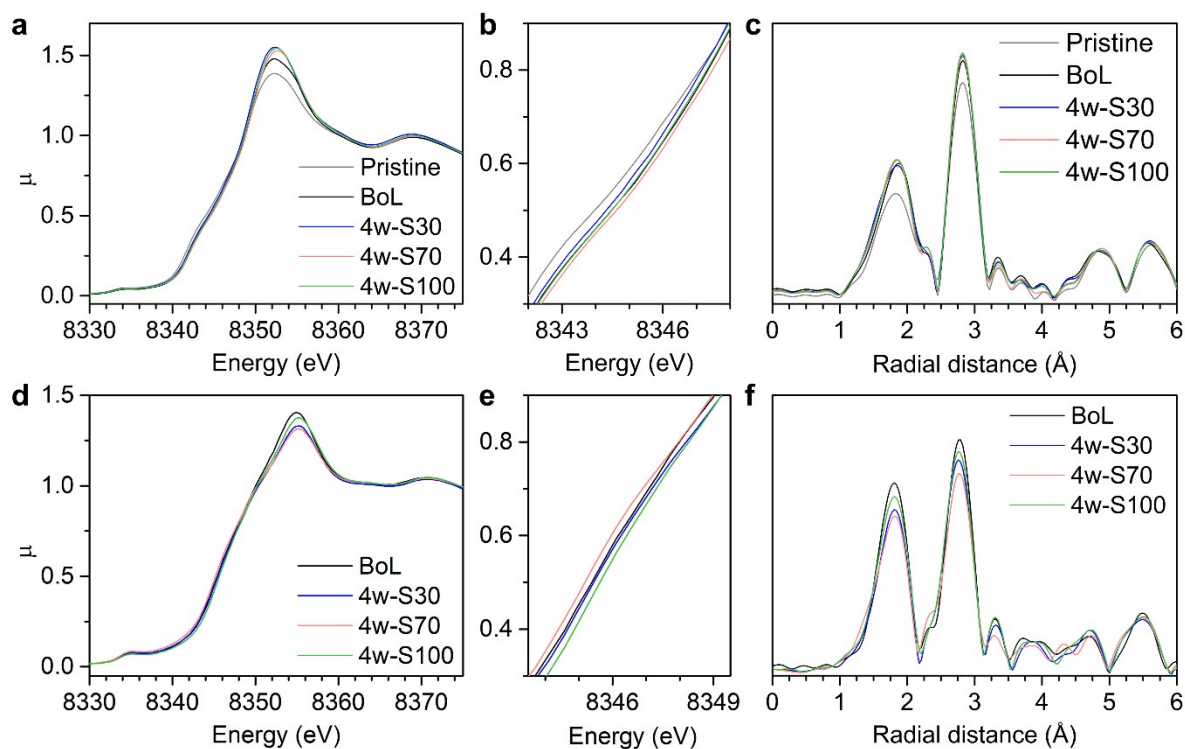

**Fig. S15** Ni K-edge XAFS results of 4-week-stored NCMA8 cathodes. **a-c** Ni K-edge XAFS at the discharge endpoint. **a** Normalized Ni K-edge XANES spectra and **b** expansion of the edge region. **c**  $k^2$ -weighted FT-EXAFS magnitudes of Ni K-edge. **d-f** Ni K-edge XAFS at the charge endpoint. **d** Normalized Ni K-edge XANES spectra and **e** expansion of the edge region. **f**  $k^2$ -weighted FT-EXAFS magnitudes of Ni K-edge. The Fourier transforms are corrected for the phase shifts of photoelectrons, to compare the radial distances with the actual distances estimated from XRD.

**Table S13** Curve fitting results for Ni K-edge EXAFS of 4-week-stored NCMA8 cathodes at the discharge endpoint (Fig. S15c).

|          | Path  | $\sigma^2$ (Å <sup>2</sup> ) | R (Å)     | $\chi_r^2$ | R-factor |
|----------|-------|------------------------------|-----------|------------|----------|
| Pristine | Ni-O  | 0.0129(13)                   | 1.950(11) | 38.4       | 0.0140   |
|          | Ni-TM | 0.0058(3)                    | 2.871(6)  |            |          |
| BoL      | Ni-O  | 0.0101(8)                    | 1.952(7)  | 7.2        | 0.0059   |
|          | Ni-TM | 0.0057(2)                    | 2.873(5)  |            |          |
| 4w-S30   | Ni-O  | 0.0106(8)                    | 1.949(7)  | 40.3       | 0.0072   |
|          | Ni-TM | 0.0056(2)                    | 2.875(5)  |            |          |
| 4w-S70   | Ni-O  | 0.0097(7)                    | 1.946(6)  | 29.0       | 0.0048   |
|          | Ni-TM | 0.0054(2)                    | 2.874(4)  |            |          |
| 4w-S100  | Ni-O  | 0.0099(7)                    | 1.948(7)  | 56.5       | 0.0062   |
|          | Ni-TM | 0.0054(2)                    | 2.874(4)  |            |          |

**Table S14** Curve fitting results for Ni K-edge EXAFS of 4-week-stored NCMA8 cathodes at the charge endpoint (Fig. S15f).

|         | Path  | $\sigma^2$ (Å <sup>2</sup> ) | R (Å)     | $\chi_r^2$ | R-factor |
|---------|-------|------------------------------|-----------|------------|----------|
| BoL     | Ni-O  | 0.0063(6)                    | 1.866(8)  | 27.4       | 0.0033   |
|         | Ni-TM | 0.0068(3)                    | 2.810(9)  |            |          |
| 4w-S30  | Ni-O  | 0.0074(5)                    | 1.864(7)  | 62.1       | 0.0031   |
|         | Ni-TM | 0.0074(3)                    | 2.802(7)  |            |          |
| 4w-S70  | Ni-O  | 0.0084(9)                    | 1.871(10) | 32.5       | 0.0099   |
|         | Ni-TM | 0.0077(5)                    | 2.822(10) |            |          |
| 4w-S100 | Ni-O  | 0.0064(7)                    | 1.859(9)  | 56.3       | 0.0043   |
|         | Ni-TM | 0.0069(4)                    | 2.797(10) |            |          |

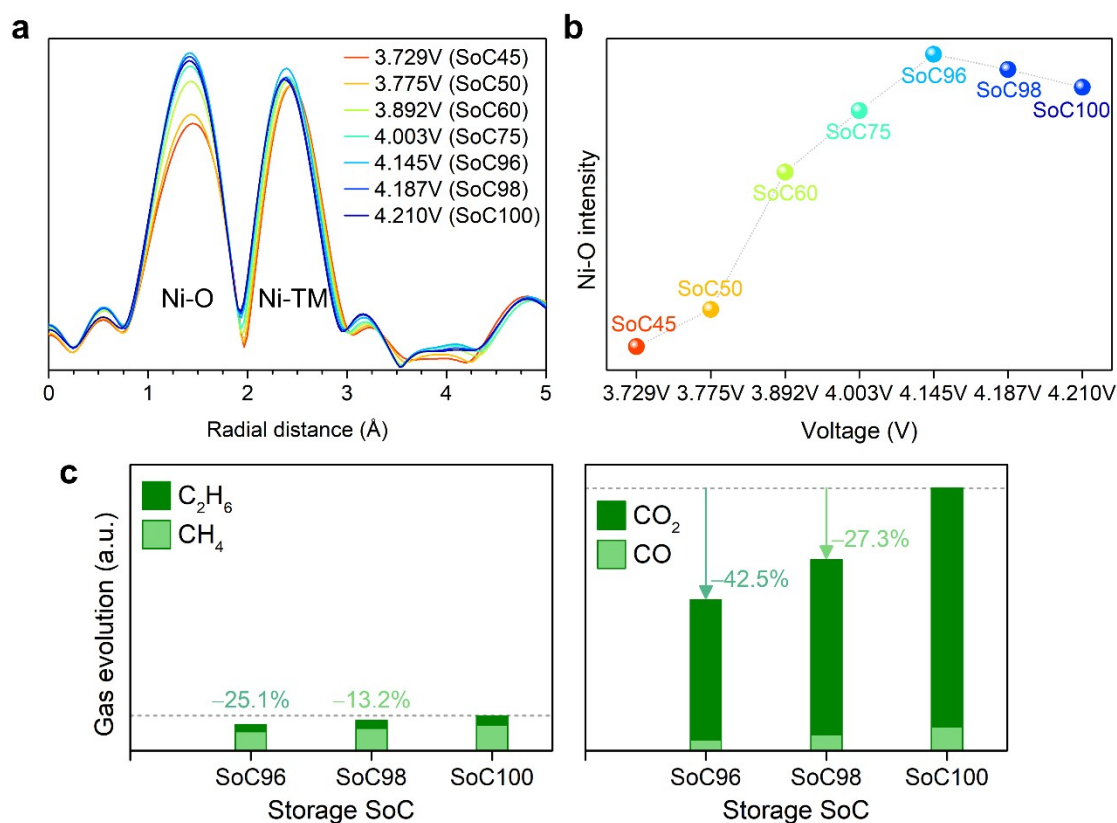

**Fig. S16** **a**  $k^2$ -weighted FT-EXAFS magnitudes of Ni K-edge and **b** the intensity of Ni-O coordination shell as a function of the cell voltage and SoC. **c** Gas evolution in NCMA8/graphite cells during high SoC storage at 60 °C. The volume of alkanes (left), which mainly evolve from the anode, and CO/CO<sub>2</sub> (right), which mainly evolve from the cathode, are plotted with the same y-axis scales.

## References

- 1 W. Weppner and R. A. Huggins, *J. Electrochem. Soc.*, 1977, **124**, 1569–1578.
- 2 S. Yang, X. Wang, X. Yang, Y. Bai, Z. Liu, H. Shu and Q. Wei, *Electrochim. Acta*, 2012, **66**, 88–93.
